# Supplementary material for: La gaufrette : coucou n° 90 du 28 février 2010
Source: MDPI journal article supplement (doi:10.3390/metabo11080552), 2010-03-16
Supplement: s1 [file s1]

**Table S1.** A complete breakdown of men’s micronutrient and macronutrient intake.

| Men’s Nutrient In-<br>take Profile | Intake Data     |                 |                 | P-value                    |                  |                      |
|------------------------------------|-----------------|-----------------|-----------------|----------------------------|------------------|----------------------|
|                                    | Normal          | Overweight      | Obese           | Normal vs. Over-<br>weight | Normal vs. Obese | Overweight vs. Obese |
| Calories (kcal)                    | 2849.22±1416.42 | 2593.05±1122.78 | 3887.58±2783.63 | 0.7328                     | 0.3559           | 0.1958               |
| Protein (g)                        | 130.43±54.86    | 104.87±40.76    | 167.99±128.71   | 0.3870                     | 0.4437           | 0.1667               |
| Tryptophan (g)                     | 1.31±0.5        | 1.07±0.43       | 1.6±1.26        | 0.3764                     | 0.5360           | 0.2289               |
| Threonine (g)                      | 4.5±1.64        | 3.51±1.26       | 5.89±4.61       | 0.2750                     | 0.4086           | 0.1438               |
| Isoleucine (g)                     | 5.53±2.24       | 4.26±1.56       | 6.95±5.37       | 0.2970                     | 0.4830           | 0.1564               |
| Leucine (g)                        | 10.03±4.17      | 7.59±2.84       | 12.05±9.02      | 0.2814                     | 0.5642           | 0.1640               |
| Lysine (g)                         | 8.31±3.28       | 6.08±2.16       | 10.46±8.44      | 0.2163                     | 0.4944           | 0.1419               |
| Methionine (g)                     | 2.7±1.05        | 2.06±0.75       | 3.43±2.71       | 0.2694                     | 0.4674           | 0.1531               |
| Cysteine (g)                       | 1.89±1.12       | 1.48±0.63       | 2.12±1.59       | 0.4685                     | 0.7588           | 0.2571               |
| Phenylalanine (g)                  | 5.42±2.19       | 4.32±1.67       | 6.71±5.03       | 0.3535                     | 0.5019           | 0.1798               |
| Tyrosine (g)                       | 4.23±1.81       | 3.23±1.21       | 5.16±4          | 0.3082                     | 0.5446           | 0.1723               |
| Valine (g)                         | 6.32±2.59       | 4.88±1.83       | 7.82±5.99       | 0.3076                     | 0.5104           | 0.1658               |
| Arginine (g)                       | 6.46±2.42       | 5.03±1.75       | 8.51±6.83       | 0.2819                     | 0.4123           | 0.1488               |
| Histamine (g)                      | 3.41±1.28       | 2.58±0.94       | 4.24±3.25       | 0.2412                     | 0.4928           | 0.1492               |
| Alanine (g)                        | 5.88±2.24       | 4.48±1.55       | 7.95±6.28       | 0.2534                     | 0.3703           | 0.1201               |
| Aspartic acid (g)                  | 10.67±4.31      | 8.23±2.95       | 13.6±10.97      | 0.2964                     | 0.4726           | 0.1639               |
| Glutamic acid (g)                  | 22.47±9.72      | 18.8±7.58       | 28.27±20.91     | 0.4818                     | 0.4760           | 0.2023               |
| Glycine (g)                        | 4.95±2.09       | 4±1.38          | 7.02±5.52       | 0.3889                     | 0.3161           | 0.1233               |
| Proline (g)                        | 8.06±4.05       | 6.69±2.77       | 9.94±7.01       | 0.5205                     | 0.5230           | 0.1967               |
| Serine (g)                         | 5.64±2.42       | 4.44±1.73       | 6.91±5.19       | 0.3548                     | 0.5284           | 0.1786               |
| Hydroxyproline (g)                 | 0.29±0.27       | 0.17±0.06       | 0.33±0.37       | 0.3787                     | 0.8009           | 0.1992               |
| Carbohydrate (g)                   | 340.68±154.57   | 350.84±199.65   | 524.63±401.48   | 0.9139                     | 0.2261           | 0.2382               |
| Glucose (g)                        | 15.3±8.07       | 17.5±9.21       | 43.51±66.58     | 0.6404                     | 0.2175           | 0.2508               |
| Fructose (g)                       | 16.91±8.57      | 20.57±10.61     | 48.56±71.47     | 0.4814                     | 0.1991           | 0.2501               |
| Galactose (g)                      | 0.14±0.11       | 0.12±0.06       | 0.19±0.17       | 0.6623                     | 0.5323           | 0.2277               |
| Sucrose (g)                        | 28.57±21.22     | 26.21±17.63     | 35.42±30.75     | 0.8353                     | 0.6237           | 0.4201               |
| Lactose (g)                        | 31.31±46.12     | 20.52±15.6      | 17.94±24.09     | 0.6344                     | 0.5690           | 0.7770               |
| Maltose (g)                        | 0.87±0.6        | 0.71±0.22       | 2.03±2.11       | 0.5943                     | 0.1319           | 0.0793               |
| Starch (g)                         | 47.6±23.79      | 38.62±18.86     | 59.67±43.53     | 0.4829                     | 0.5004           | 0.1829               |
| Fiber (g)                          | 28.85±15.2      | 28.05±16.52     | 41.8±34.24      | 0.9270                     | 0.3297           | 0.2701               |
| Total Fat (g)                      | 106.24±63.79    | 87.57±33.78     | 130.94±89.35    | 0.5643                     | 0.5510           | 0.1759               |
| Trans fat (g)                      | 2.19±2.66       | 1.39±0.57       | 1.99±1.5        | 0.5418                     | 0.8796           | 0.2626               |
| Trans-MUFA (g)                     | 1.47±1.8        | 0.99±0.42       | 1.46±1.15       | 0.5873                     | 0.9908           | 0.2516               |
| Trans-PUFA (g)                     | 0.37±0.51       | 0.2±0.09        | 0.29±0.25       | 0.4948                     | 0.7347           | 0.3317               |
| Saturated Fat (g)                  | 32.89±19.11     | 28.77±12.08     | 41.9±29.41      | 0.6743                     | 0.4893           | 0.2135               |
| Butyric acid (g)                   | 0.68±0.48       | 0.62±0.4        | 0.81±0.67       | 0.7973                     | 0.6794           | 0.4393               |
| Caproic acid (g)                   | 0.37±0.25       | 0.36±0.25       | 0.44±0.35       | 0.9037                     | 0.7104           | 0.5749               |
| Caprylic acid (g)                  | 0.28±0.17       | 0.29±0.21       | 0.34±0.33       | 0.8892                     | 0.6170           | 0.6803               |
| Capric acid (g)                    | 0.49±0.32       | 0.49±0.29       | 0.6±0.5         | 0.9956                     | 0.6123           | 0.5444               |
| Lauric acid (g)                    | 0.61±0.43       | 0.76±0.68       | 0.9±0.89        | 0.6068                     | 0.4122           | 0.6904               |
| Myristic acid (g)                  | 2.62±1.53       | 2.36±1.27       | 3.31±2.68       | 0.7458                     | 0.5376           | 0.3232               |
| Palmitic acid (g)                  | 18.46±10.44     | 15.67±6.35      | 23.42±16.09     | 0.6015                     | 0.4866           | 0.1802               |
| Stearic acid (g)                   | 8.2±5.09        | 7.38±3.07       | 10.84±7.59      | 0.7517                     | 0.4409           | 0.2042               |
| Arachidic acid (g)                 | 0.22±0.17       | 0.15±0.08       | 0.21±0.14       | 0.4421                     | 0.8738           | 0.3071               |
| Behenic acid (g)                   | 0.21±0.24       | 0.14±0.13       | 0.16±0.17       | 0.5662                     | 0.6727           | 0.7953               |
| MUFA (g)                           | 42.65±25.16     | 34.96±12.84     | 50.81±33.89     | 0.5469                     | 0.6104           | 0.1911               |
| Myristoleic acid (g)               | 0.12±0.1        | 0.09±0.04       | 0.1±0.07        | 0.4642                     | 0.6792           | 0.5801               |
| Palmitoleic acid (g)               | 1.61±0.82       | 1.31±0.51       | 2.16±1.52       | 0.4781                     | 0.3764           | 0.1181               |
| Erucic acid (g)                    | 0.04±0.07       | 0.05±0.09       | 0.09±0.21       | 0.8191                     | 0.5262           | 0.6005               |
| Gadoleic acid (g)                  | 0.33±0.2        | 0.27±0.12       | 0.38±0.26       | 0.5246                     | 0.7178           | 0.2426               |
| Oleic acid (g)                     | 38.8±22.82      | 32.02±11.81     | 46.57±31.15     | 0.5580                     | 0.5948           | 0.1915               |
| Elaidic acid (g)                   | 10.42±7.65      | 6.96±2.83       | 9.75±6.02       | 0.3758                     | 0.8687           | 0.2049               |
| Vaccenic acid (g)                  | 1.3±1.64        | 0.96±0.5        | 1.16±1.1        | 0.6779                     | 0.8732           | 0.6124               |
| Rumenic acid (g)                   | 0.04±0.03       | 0.02±0.01       | 0.03±0.03       | 0.2846                     | 0.9631           | 0.0741               |
| PUFA (g)                           | 23.23±16.23     | 17.36±7.1       | 27.41±19.42     | 0.4753                     | 0.66952          | 0.1500               |
| Linoleic acid (g)                  | 20.54±14.74     | 15.29±6.31      | 23.98±17.12     | 0.4806                     | 0.6962           | 0.1576               |
| Linolenic acid (g)                 | 1.98±1.05       | 1.57±0.67       | 2.58±1.85       | 0.4639                     | 0.4358           | 0.1326               |
| Arachidonic acid (g)               | 0.2±0.05        | 0.16±0.09       | 0.26±0.2        | 0.2535                     | 0.4050           | 0.1741               |
| DPA (g)                            | 0.01±0          | 0.01±0.01       | 0.02±0.03       | 0.9730                     | 0.4321           | 0.4428               |
| EPA (g)                            | 0.02±0.01       | 0.02±0.01       | 0.04±0.06       | 0.8276                     | 0.4708           | 0.5093               |

|                       |                 |                 |                   |        |        |        |
|-----------------------|-----------------|-----------------|-------------------|--------|--------|--------|
| DHA (g)               | 0.07±0.06       | 0.05±0.03       | 0.13±0.23         | 0.5489 | 0.4659 | 0.3303 |
| Cholesterol (mg)      | 473.65±93.69    | 367.07±200.98   | 536.97±390.65     | 0.1702 | 0.6370 | 0.2385 |
| Stigmasterol (mg)     | 6.52±5.39       | 4.21±2.71       | 7.42±5.06         | 0.4068 | 0.7643 | 0.0970 |
| Campesterol (mg)      | 16.26±6.33      | 10.88±4.51      | 17.91±8.79        | 0.1378 | 0.6850 | 0.0404 |
| Daidzein (mg)         | 0.21±0.14       | 0.12±0.05       | 0.17±0.14         | 0.2265 | 0.6315 | 0.3041 |
| Genistein (mg)        | 0.17±0.13       | 0.12±0.06       | 0.15±0.13         | 0.4863 | 0.8062 | 0.5497 |
| Caffeine (mg)         | 198.7±189.28    | 83.57±101.24    | 122.5±128.21      | 0.2561 | 0.4483 | 0.4535 |
| Vitamin C (mg)        | 141.54±75.42    | 137.44±54.12    | 365.14±457.02     | 0.9165 | 0.1630 | 0.1510 |
| Thiamin (mg)          | 2.22±0.91       | 2.41±1.43       | 3.7±2.74          | 0.7549 | 0.1470 | 0.2034 |
| Riboflavin (mg)       | 3.58±2.48       | 3.02±1.66       | 4.55±3.6          | 0.6643 | 0.5554 | 0.2437 |
| Niacin (mg)           | 34.14±13.41     | 30.35±16.23     | 50.63±38.03       | 0.6358 | 0.2427 | 0.1445 |
| Pantothenic acid (mg) | 8.86±4.59       | 6.69±2.94       | 10.5±8.26         | 0.3733 | 0.6307 | 0.1956 |
| Pyridoxine (mg)       | 3.17±1.28       | 2.72±1.37       | 5.24±4.45         | 0.5469 | 0.1986 | 0.1155 |
| Cobalamin (µg)        | 10.82±7.98      | 10.42±9.93      | 12.6±10.86        | 0.9336 | 0.7253 | 0.6371 |
| Choline (mg)          | 547.94±227.67   | 431.35±170.17   | 690.01±583.89     | 0.3451 | 0.5126 | 0.2058 |
| Folic acid (µg)       | 201.95±58.97    | 282.87±221.38   | 548.4±678.01      | 0.2806 | 0.1422 | 0.2625 |
| Folate (µg)           | 355.32±172.62   | 323.51±168.99   | 612.87±742.9      | 0.7402 | 0.3205 | 0.2568 |
| Vitamin A (IU)        | 8755.17±6155.35 | 8216±4851.85    | 25178.78±42184.34 | 0.8680 | 0.2564 | 0.2373 |
| Retinol (µg)          | 952.38±848.97   | 901.65±940.88   | 877.07±852.74     | 0.9172 | 0.8755 | 0.9506 |
| RAE (µg)              | 1244.65±979.47  | 1168.2±975.19   | 2012.48±2768.39   | 0.8885 | 0.4476 | 0.3802 |
| β-carotene (µg)       | 3138.56±2453.9  | 2766.77±1783.66 | 12516.57±23555.22 | 0.7712 | 0.2431 | 0.2238 |
| α-carotene (µg)       | 516.09±216.24   | 595.73±550.67   | 1578±2090.27      | 0.6849 | 0.1450 | 0.1797 |
| Vitamin E (mg)        | 11.38±6.78      | 8.37±3          | 16.92±16.81       | 0.3863 | 0.3827 | 0.1453 |
| Vitamin D (IU)        | 400.41±492.74   | 289.24±194.16   | 334.95±391.05     | 0.6483 | 0.8035 | 0.7437 |
| Vitamin D2 (µg)       | 0.01±0.01       | 0±0.01          | 0.02±0.03         | 0.5093 | 0.4221 | 0.2279 |
| Vitamin D3 (µg)       | 9.36±12.12      | 6.17±3.82       | 7.32±9.41         | 0.5933 | 0.7518 | 0.7252 |
| Vitamin D (µg)        | 9.98±12.27      | 7.21±4.85       | 8.32±9.72         | 0.6480 | 0.8006 | 0.7479 |
| Cryptoxanthin (µg)    | 152.42±61.4     | 157.71±100.05   | 498.45±768.89     | 0.8989 | 0.1902 | 0.1968 |
| Lycopene              | 9727.87±7756.66 | 8131.87±4076.88 | 18930.63±32829    | 0.6825 | 0.4187 | 0.3279 |
| Lutein (µg)           | 2337.18±1853.43 | 2372.47±1547.51 | 12382.28±26801.91 | 0.9715 | 0.2679 | 0.2684 |
| Betaine (µg)          | 64.96±29.39     | 61.15±31.77     | 125.68±177.86     | 0.8203 | 0.3181 | 0.2857 |
| β-tocopherol (mg)     | 0.13±0.08       | 0.11±0.04       | 0.16±0.14         | 0.6144 | 0.6228 | 0.3001 |
| γ-tocopherol (mg)     | 7.91±5.34       | 6.36±3.26       | 10.12±7.82        | 0.5726 | 0.5336 | 0.1840 |
| δ-tocopherol (mg)     | 1.56±1.17       | 1.41±0.76       | 2.19±1.75         | 0.8017 | 0.4256 | 0.2167 |
| Vitamin K (µg)        | 143.99±90.21    | 109.78±61.64    | 517.89±1132.65    | 0.4715 | 0.3260 | 0.2844 |
| Calcium (mg)          | 1638.77±1318.06 | 1335.84±585.56  | 1993.93±1579.95   | 0.6445 | 0.6560 | 0.2396 |
| Iron (mg)             | 21.81±9         | 22.72±14.22     | 40.82±32.48       | 0.8805 | 0.1120 | 0.1296 |
| Magnesium (mg)        | 486.81±265.34   | 407.73±166.5    | 686.17±604.28     | 0.5639 | 0.3916 | 0.1884 |
| Phosphorus (mg)       | 2319.14±1194.68 | 1819.66±787.33  | 2673.14±1991.9    | 0.4277 | 0.6756 | 0.2298 |
| Potassium (mg)        | 4485.62±2460.57 | 3666.37±1529.95 | 6383.01±5808.11   | 0.5204 | 0.3918 | 0.1815 |
| Sodium (mg)           | 4527.76±2041.31 | 4264±1983.85    | 6723.68±5124.26   | 0.8154 | 0.2593 | 0.1812 |
| Zinc (mg)             | 18.76±9.66      | 15.45±6.19      | 26.18±19.85       | 0.5100 | 0.3478 | 0.1305 |
| Copper (mg)           | 2.24±1.53       | 2.31±1.72       | 2.81±2.27         | 0.9346 | 0.5748 | 0.5803 |
| Manganese (mg)        | 3.71±1.81       | 4.09±2.33       | 6.79±5.71         | 0.7296 | 0.1459 | 0.1896 |
| Selenium (µg)         | 167.36±61.53    | 142.11±60.77    | 214.31±158.6      | 0.4677 | 0.4270 | 0.2026 |

Data are represented by mean±SD; *P* < 0.05 represents a significant difference and is bolded

**Table S2.** A complete breakdown of women’s micronutrient and macronutrient intake.

| Women’s Nutrient In-<br>take Profile | Intake Data    |                |                 | P-value                    |                     |                         |
|--------------------------------------|----------------|----------------|-----------------|----------------------------|---------------------|-------------------------|
|                                      | Normal         | Overweight     | Obese           | Normal vs. Over-<br>weight | Normal vs.<br>Obese | Overweight vs.<br>Obese |
| Calories (kcal)                      | 1920.13±682.75 | 1938.09±976.16 | 3325.58±1294.92 | 0.9585                     | <b>0.0006</b>       | <b>0.0034</b>           |
| Protein (g)                          | 82.41±30.77    | 79.53±38.03    | 139.89±55.75    | 0.8371                     | <b>0.0011</b>       | <b>0.0022</b>           |
| Tryptophan (g)                       | 0.83±0.34      | 0.82±0.39      | 1.41±0.59       | 0.9247                     | <b>0.0019</b>       | <b>0.0038</b>           |
| Threonine (g)                        | 2.68±0.99      | 2.73±1.28      | 4.75±1.95       | 0.9202                     | <b>0.0007</b>       | <b>0.0027</b>           |
| Isoleucine (g)                       | 3.34±1.27      | 3.29±1.66      | 5.81±2.3        | 0.9426                     | <b>0.0007</b>       | <b>0.0024</b>           |
| Leucine (g)                          | 6±2.33         | 5.99±3.1       | 10.42±4.17      | 0.9956                     | <b>0.0008</b>       | <b>0.0035</b>           |
| Lysine (g)                           | 4.79±1.77      | 4.8±2.51       | 8.51±3.57       | 0.9901                     | <b>0.0008</b>       | <b>0.0034</b>           |
| Methionine (g)                       | 1.6±0.61       | 1.62±0.81      | 2.82±1.16       | 0.9528                     | <b>0.0008</b>       | <b>0.0034</b>           |
| Cysteine (g)                         | 1.12±0.53      | 1.14±0.8       | 1.89±0.74       | 0.9493                     | <b>0.0019</b>       | <b>0.0222</b>           |
| Phenylalanine (g)                    | 3.38±1.3       | 3.35±1.67      | 5.86±2.31       | 0.9567                     | <b>0.0008</b>       | <b>0.0026</b>           |
| Tyrosine (g)                         | 2.59±1.01      | 2.53±1.28      | 4.52±1.84       | 0.8995                     | <b>0.0009</b>       | <b>0.0024</b>           |
| Valine (g)                           | 3.91±1.45      | 3.84±1.96      | 6.77±2.73       | 0.9253                     | <b>0.0009</b>       | <b>0.0028</b>           |
| Arginine (g)                         | 3.64±1.35      | 3.88±1.86      | 6.69±2.82       | 0.7120                     | <b>0.0005</b>       | <b>0.0038</b>           |
| Histamine (g)                        | 1.98±0.76      | 2.03±0.99      | 3.51±1.49       | 0.8976                     | <b>0.0010</b>       | <b>0.0039</b>           |
| Alanine (g)                          | 3.27±1.21      | 3.5±1.68       | 6.09±2.57       | 0.6988                     | <b>0.0005</b>       | <b>0.0035</b>           |
| Aspartic acid (g)                    | 6.23±2.18      | 6.4±3.22       | 11.02±4.49      | 0.8841                     | <b>0.0007</b>       | <b>0.0039</b>           |
| Glutamic acid (g)                    | 14.86±6.04     | 14.34±7.28     | 25.47±10.08     | 0.8452                     | <b>0.0010</b>       | <b>0.0023</b>           |
| Glycine (g)                          | 2.76±1.04      | 3.08±1.51      | 5.53±2.99       | 0.5490                     | <b>0.0018</b>       | <b>0.0084</b>           |
| Proline (g)                          | 5.54±2.33      | 5.12±2.77      | 9.59±3.78       | 0.6809                     | <b>0.0009</b>       | <b>0.0013</b>           |
| Serine (g)                           | 3.5±1.33       | 3.41±1.76      | 6.1±2.35        | 0.8811                     | <b>0.0006</b>       | <b>0.0020</b>           |
| Hydroxyproline (g)                   | 0.1±0.07       | 0.13±0.08      | 0.2±0.1         | 0.3875                     | <b>0.0038</b>       | <b>0.0477</b>           |
| Carbohydrate (g)                     | 268.1±96.42    | 264.76±152.07  | 428.54±178.08   | 0.9494                     | <b>0.0033</b>       | <b>0.0157</b>           |
| Glucose (g)                          | 14.83±8.99     | 14.54±9.14     | 22±14.97        | 0.9365                     | 0.1050              | 0.1141                  |
| Fructose (g)                         | 17.33±10.44    | 14.59±6.53     | 24.56±16.87     | 0.4103                     | 0.1482              | 0.0389                  |
| Galactose (g)                        | 0.07±0.03      | 0.1±0.12       | 0.15±0.08       | 0.4326                     | <b>0.0015</b>       | 0.2897                  |
| Sucrose (g)                          | 16.68±10.98    | 21.3±30.76     | 30.75±20.5      | 0.6416                     | <b>0.0204</b>       | 0.3826                  |
| Lactose (g)                          | 18.01±16.23    | 15.23±24.98    | 22.41±18.87     | 0.7492                     | 0.4773              | 0.4261                  |
| Maltose (g)                          | 0.61±0.36      | 1.14±1.4       | 1.15±0.55       | 0.2493                     | <b>0.0023</b>       | 0.9705                  |
| Starch (g)                           | 37.45±18.5     | 33.92±26.97    | 49.53±17.24     | 0.7110                     | 0.0621              | 0.1081                  |
| Fiber (g)                            | 24.28±9.69     | 23.59±10.12    | 37.76±19.25     | 0.8605                     | <b>0.0172</b>       | <b>0.0176</b>           |
| Total Fat (g)                        | 61.23±22.98    | 63.94±28.78    | 123.44±49.54    | 0.7969                     | <b>0.0001</b>       | <b>0.0005</b>           |
| Trans fat (g)                        | 0.96±0.36      | 1±0.6          | 2.18±1.27       | 0.8602                     | <b>0.0013</b>       | <b>0.0029</b>           |
| Trans-MUFA (g)                       | 0.68±0.27      | 0.7±0.41       | 1.62±1          | 0.8682                     | <b>0.0015</b>       | <b>0.0028</b>           |
| Trans-PUFA (g)                       | 0.12±0.05      | 0.14±0.1       | 0.3±0.18        | 0.5896                     | <b>0.0007</b>       | <b>0.0043</b>           |
| Saturated Fat (g)                    | 21.26±9.11     | 21.11±10.26    | 42.6±18.74      | 0.9690                     | <b>0.0003</b>       | <b>0.0006</b>           |
| Butyric acid (g)                     | 0.56±0.31      | 0.52±0.44      | 1.07±0.62       | 0.7867                     | <b>0.0061</b>       | <b>0.0110</b>           |
| Caproic acid (g)                     | 0.31±0.2       | 0.27±0.22      | 0.54±0.33       | 0.6341                     | <b>0.0217</b>       | <b>0.0152</b>           |
| Caprylic acid (g)                    | 0.24±0.17      | 0.2±0.13       | 0.39±0.24       | 0.4719                     | 0.0511              | <b>0.0115</b>           |
| Capric acid (g)                      | 0.42±0.23      | 0.37±0.28      | 0.73±0.41       | 0.6604                     | <b>0.0105</b>       | <b>0.0096</b>           |
| Lauric acid (g)                      | 0.57±0.39      | 0.47±0.31      | 0.91±0.54       | 0.4678                     | <b>0.0413</b>       | <b>0.0096</b>           |
| Myristic acid (g)                    | 2.01±1.09      | 1.83±1.03      | 3.77±1.94       | 0.6672                     | <b>0.0034</b>       | <b>0.0020</b>           |
| Palmitic acid (g)                    | 11.28±4.54     | 11.54±5.45     | 22.8±9.56       | 0.8991                     | <b>0.0002</b>       | <b>0.0005</b>           |
| Stearic acid (g)                     | 5.17±2.19      | 5.25±2.45      | 11.03±5.13      | 0.9309                     | <b>0.0003</b>       | <b>0.0005</b>           |
| Arachidic acid (g)                   | 0.1±0.04       | 0.11±0.05      | 0.21±0.09       | 0.5508                     | <b>0.0002</b>       | <b>0.0011</b>           |
| Behenic acid (g)                     | 0.08±0.06      | 0.09±0.05      | 0.15±0.08       | 0.6503                     | <b>0.0071</b>       | <b>0.0166</b>           |
| MUFA (g)                             | 23.21±8.4      | 26.17±14.34    | 48.94±19.77     | 0.5473                     | <b>6.602E-05</b>    | <b>0.0016</b>           |
| Myristoleic acid (g)                 | 0.06±0.03      | 0.07±0.08      | 0.13±0.06       | 0.7273                     | <b>0.0011</b>       | <b>0.0590</b>           |
| Palmitoleic acid (g)                 | 0.9±0.37       | 1.06±0.56      | 1.92±0.79       | 0.4357                     | <b>0.0001</b>       | <b>0.0024</b>           |
| Erucic acid (g)                      | 0.07±0.1       | 0.19±0.56      | 0.04±0.05       | 0.4830                     | 0.4253              | 0.4091                  |
| Gadoleic acid (g)                    | 0.18±0.08      | 0.22±0.19      | 0.33±0.15       | 0.4669                     | <b>0.0008</b>       | 0.1179                  |
| Oleic acid (g)                       | 21.38±7.84     | 23.42±10.88    | 44.89±18.21     | 0.6016                     | <b>0.0001</b>       | <b>0.0006</b>           |
| Elaidic acid (g)                     | 4.16±1.48      | 5.18±3.87      | 9.86±4          | 0.4225                     | <b>2.053E-05</b>    | <b>0.0054</b>           |
| Vaccenic acid (g)                    | 0.5±0.24       | 0.61±0.61      | 1.37±0.95       | 0.5606                     | <b>0.0018</b>       | <b>0.0164</b>           |
| Rumenic acid (g)                     | 0.02±0.01      | 0.02±0.02      | 0.04±0.02       | 0.7076                     | <b>0.0046</b>       | <b>0.0245</b>           |
| PUFA (g)                             | 11.84±4.42     | 12.01±4.73     | 22.99±8.4       | 0.9263                     | <b>6.358E-05</b>    | <b>0.0002</b>           |
| Linoleic acid (g)                    | 10.39±3.99     | 10.34±3.93     | 20.22±7.48      | 0.9754                     | <b>7.315E-05</b>    | <b>0.0001</b>           |
| Linolenic acid (g)                   | 1.14±0.44      | 1.18±0.49      | 2.16±0.86       | 0.8276                     | <b>0.0002</b>       | <b>0.0007</b>           |
| Arachidonic acid (g)                 | 0.1±0.05       | 0.12±0.08      | 0.19±0.09       | 0.4977                     | <b>0.0018</b>       | <b>0.0449</b>           |
| DPA (g)                              | 0.01±0.01      | 0.01±0         | 0.01±0.01       | 0.2690                     | 0.1815              | <b>0.0435</b>           |
| EPA (g)                              | 0.02±0.01      | 0.02±0.02      | 0.03±0.02       | 0.8795                     | 0.1049              | 0.1322                  |
| DHA (g)                              | 0.04±0.02      | 0.03±0.02      | 0.07±0.05       | 0.5017                     | <b>0.0330</b>       | <b>0.0136</b>           |

|                       |                 |                 |                   |        |               |               |
|-----------------------|-----------------|-----------------|-------------------|--------|---------------|---------------|
| Cholesterol (mg)      | 234.32±120.08   | 271.48±157.3    | 467.48±212.24     | 0.5164 | <b>0.0006</b> | <b>0.0096</b> |
| Stigmasterol (mg)     | 2.69±1.01       | 3.16±1.66       | 6.97±3.5          | 0.4190 | <b>0.0001</b> | <b>0.0007</b> |
| Campesterol (mg)      | 7.75±3.49       | 9.58±4.69       | 16.87±8.52        | 0.2863 | <b>0.0005</b> | <b>0.0074</b> |
| Daidzein              | 1.2±4.42        | 0.71±2.02       | 0.38±0.63         | 0.7003 | 0.4748        | 0.6159        |
| Genistein             | 1.14±4.22       | 0.83±2.47       | 0.4±0.78          | 0.8104 | 0.5009        | 0.5911        |
| Caffeine              | 86.13±118.15    | 76.38±122.67    | 86.53±107.83      | 0.8388 | 0.9920        | 0.8250        |
| Vitamin C (mg)        | 114.1±48.49     | 131.81±87.76    | 216.58±192.92     | 0.5525 | <b>0.0480</b> | 0.1279        |
| Thiamin (mg)          | 1.95±1.05       | 1.85±1.2        | 3.01±1.6          | 0.8358 | <b>0.0306</b> | <b>0.0384</b> |
| Riboflavin (mg)       | 2.73±1.26       | 2.86±2.23       | 4.09±2.4          | 0.8710 | 0.0509        | 0.1786        |
| Niacin (mg)           | 23.7±13.46      | 25.02±17.3      | 37.29±19.2        | 0.8333 | <b>0.0249</b> | 0.0926        |
| Pantothenic acid (mg) | 5.76±2.34       | 6.46±4.17       | 9.91±7.27         | 0.6234 | <b>0.0373</b> | 0.1229        |
| Pyridoxine (mg)       | 2.6±1.71        | 2.51±1.81       | 3.97±3.32         | 0.8994 | 0.1441        | 0.1445        |
| Cobalamin (μg)        | 8.98±8.06       | 18.19±26.29     | 16.54±18.61       | 0.2836 | 0.1405        | 0.8585        |
| Choline (mg)          | 320.28±130.4    | 364.07±214.99   | 555.12±245.63     | 0.5552 | <b>0.0020</b> | <b>0.0403</b> |
| Folic acid (μg)       | 330.94±420.44   | 204.34±198.65   | 403.95±340.13     | 0.3063 | 0.5890        | 0.0611        |
| Folate (μg)           | 275.56±117.03   | 287.11±134.66   | 439.21±249.81     | 0.8199 | <b>0.0232</b> | <b>0.0472</b> |
| Vitamin A (IU)        | 8568.65±7386.44 | 9927.23±8951.83 | 12872.29±11461.5  | 0.6825 | 0.2079        | 0.4543        |
| Retinol               | 786.08±669.3    | 1661.5±2421.73  | 1356.06±1502.85   | 0.2671 | 0.1691        | 0.7134        |
| RAE                   | 1087±866.13     | 1883.43±2461.79 | 1780.89±1780.37   | 0.3238 | 0.1641        | 0.9064        |
| β-carotene            | 3191.09±3124.96 | 2366.18±865.52  | 4449.92±4001.75   | 0.3297 | 0.3204        | 0.0526        |
| α-carotene            | 629.73±926.45   | 360.81±255.23   | 825.98±811.34     | 0.2849 | 0.5234        | <b>0.0393</b> |
| Vitamin E             | 7.53±3.96       | 6.67±2.85       | 13.27±8.97        | 0.5166 | <b>0.0253</b> | <b>0.0104</b> |
| Vitamin D (IU)        | 239.95±157.01   | 225.55±257.32   | 322.59±212.86     | 0.8707 | 0.2126        | 0.3111        |
| Vitamin D2            | 0.11±0.41       | 0.18±0.56       | 0.05±0.16         | 0.7470 | 0.5551        | 0.4648        |
| Vitamin D3            | 5.24±4.19       | 4.69±6.18       | 7.16±4.95         | 0.8005 | 0.2378        | 0.2804        |
| Vitamin D (μg)        | 5.99±3.96       | 5.59±6.31       | 8.02±5.33         | 0.8549 | 0.2231        | 0.3051        |
| Cryptoxanthin         | 128.75±97.15    | 175.64±201.62   | 296±287.08        | 0.4863 | 0.0347        | 0.2044        |
| Lycopene              | 6627.89±4404.32 | 6640.7±3617.68  | 14602.45±16412.12 | 0.9935 | 0.0690        | 0.0694        |
| Lutein                | 2549.08±2060.93 | 1950.05±671.92  | 3153.87±3293.36   | 0.2926 | 0.5299        | 0.1613        |
| Betaine               | 56.42±32.87     | 47.7±13.08      | 84.6±68.33        | 0.3495 | 0.1411        | <b>0.0442</b> |
| β-tocopherol          | 0.07±0.03       | 0.07±0.03       | 0.14±0.06         | 0.9950 | <b>0.0005</b> | <b>0.0007</b> |
| γ-tocopherol          | 3.95±1.89       | 3.92±1.82       | 8.19±3.28         | 0.9703 | <b>0.0001</b> | <b>0.0002</b> |
| δ-tocopherol          | 0.83±0.45       | 0.75±0.31       | 1.96±1.02         | 0.6149 | <b>0.0004</b> | <b>0.0002</b> |
| Vitamin K             | 132.96±106.45   | 107.94±22.36    | 180.53±165.77     | 0.3750 | 0.3324        | 0.0930        |
| Calcium               | 1327.63±448.3   | 1118.5±793.39   | 2066.82±1190.16   | 0.4414 | <b>0.0266</b> | <b>0.0178</b> |
| Iron                  | 19.53±12.84     | 19.99±17.63     | 28.96±14.69       | 0.9428 | <b>0.0584</b> | <b>0.1773</b> |
| Magnesium             | 356.42±112.14   | 338.67±165.53   | 535.33±252.55     | 0.7604 | <b>0.0143</b> | <b>0.0195</b> |
| Phosphorus            | 1537.85±581.12  | 1438.61±777.14  | 2508.04±1128.03   | 0.7232 | <b>0.0045</b> | <b>0.0064</b> |
| Potassium             | 3197.34±1123.15 | 3131.88±1662.87 | 5038.81±2384.65   | 0.9107 | <b>0.0088</b> | <b>0.0195</b> |
| Sodium                | 3217.48±1360.2  | 3070.92±1584.84 | 5657.28±2179.03   | 0.8053 | <b>0.0006</b> | <b>0.0012</b> |
| Zinc                  | 12.79±5.37      | 12.66±6.52      | 21.61±13.1        | 0.9553 | <b>0.0181</b> | <b>0.0243</b> |
| Copper                | 1.85±1.31       | 3.63±4.36       | 3.41±3.1          | 0.2133 | 0.0693        | 0.8872        |
| Manganese             | 3.64±1.65       | 3.35±1.79       | 5.22±2.84         | 0.6677 | 0.0608        | <b>0.0420</b> |
| Selenium              | 110.62±46.84    | 107.6±53.77     | 178.61±73.41      | 0.8814 | <b>0.0036</b> | <b>0.0067</b> |

Data are represented by mean±SD; *P* < 0.05 represents a significant difference and is bolded

**Table S3.** Men's food group consumption between normal, overweight, and obese subjects.

| Men's Food Groups | Intake Data   |               |                | <i>p-value</i>        |                  |                      |
|-------------------|---------------|---------------|----------------|-----------------------|------------------|----------------------|
|                   | Normal        | Overweight    | Obese          | Normal vs. Overweight | Normal vs. Obese | Overweight vs. Obese |
| Red Meat (g)      | 107.21±88.89  | 84.19±39.49   | 165.78±188.82  | 0.6042                | 0.4289           | 0.2108               |
| White Meat (g)    | 72.38±59.89   | 44.99±33.64   | 94.21±144.43   | 0.3813                | 0.6870           | 0.3178               |
| Poultry (g)       | 54.34±56.1    | 32.46±27.14   | 51.99±56.28    | 0.4457                | 0.9409           | 0.3374               |
| Fish (g)          | 16.35±24.72   | 9.07±8.44     | 41.44±92.6     | 0.5531                | 0.4393           | 0.2990               |
| Beans (g)         | 105.4±123.94  | 92.75±136.7   | 45.53±26.31    | 0.8590                | 0.3433           | 0.2858               |
| Fruit (g)         | 154.98±107.28 | 143.73±102.44 | 269.16±320.06  | 0.8489                | 0.3279           | 0.2616               |
| Fruit Juice (g)   | 66.64±71.25   | 80.74±80.42   | 544.74±1305.85 | 0.7615                | 0.3358           | 0.3489               |
| Vegetables (g)    | 151.68±105.09 | 176.04±120.08 | 550.91±1010.6  | 0.6911                | 0.2465           | 0.2730               |

Data are represented by mean±SD;  $P < 0.05$  represents a significant difference and is bolded.

**Table S4.** Women's food group consumption between normal, overweight, and obese subjects.

| Women's Food Groups | Intake Data   |               |               | <i>p-value</i>        |                  |                      |
|---------------------|---------------|---------------|---------------|-----------------------|------------------|----------------------|
|                     | Normal        | Overweight    | Obese         | Normal vs. Overweight | Normal vs. Obese | Overweight vs. Obese |
| Red Meat (g)        | 38.74±25.38   | 61.37±41.17   | 101.76±65.28  | 0.1251                | 0.0552           | <b>0.00134</b>       |
| White Meat (g)      | 39.57±20.78   | 30.78±18.95   | 56.33±37.48   | 0.2666                | <b>0.0253</b>    | 0.1219               |
| Poultry (g)         | 28.92±17.25   | 20.73±18.81   | 33.95±25.28   | 0.2636                | 0.1258           | 0.5076               |
| Fish (g)            | 8.19±7.77     | 6.92±6.1      | 19.06±17.79   | 0.6378                | <b>0.0170</b>    | 0.0314               |
| Beans (g)           | 52.79±61.54   | 39.89±46.73   | 83.38±79.01   | 0.5421                | 0.2163           | 0.0747               |
| Fruit (g)           | 210.64±140.15 | 176.11±139.38 | 270.7±227.19  | 0.5346                | 0.4175           | 0.2273               |
| Fruit Juice (g)     | 62.21±88.97   | 133.17±95.96  | 136.18±178.48 | 0.3298                | 0.1662           | 0.9681               |
| Vegetables (g)      | 202.56±202.37 | 246.87±146.85 | 281.27±203.58 | 0.5159                | 0.3317           | 0.6543               |

Data are represented by mean±SD;  $P < 0.05$  represents a significant difference and is bolded

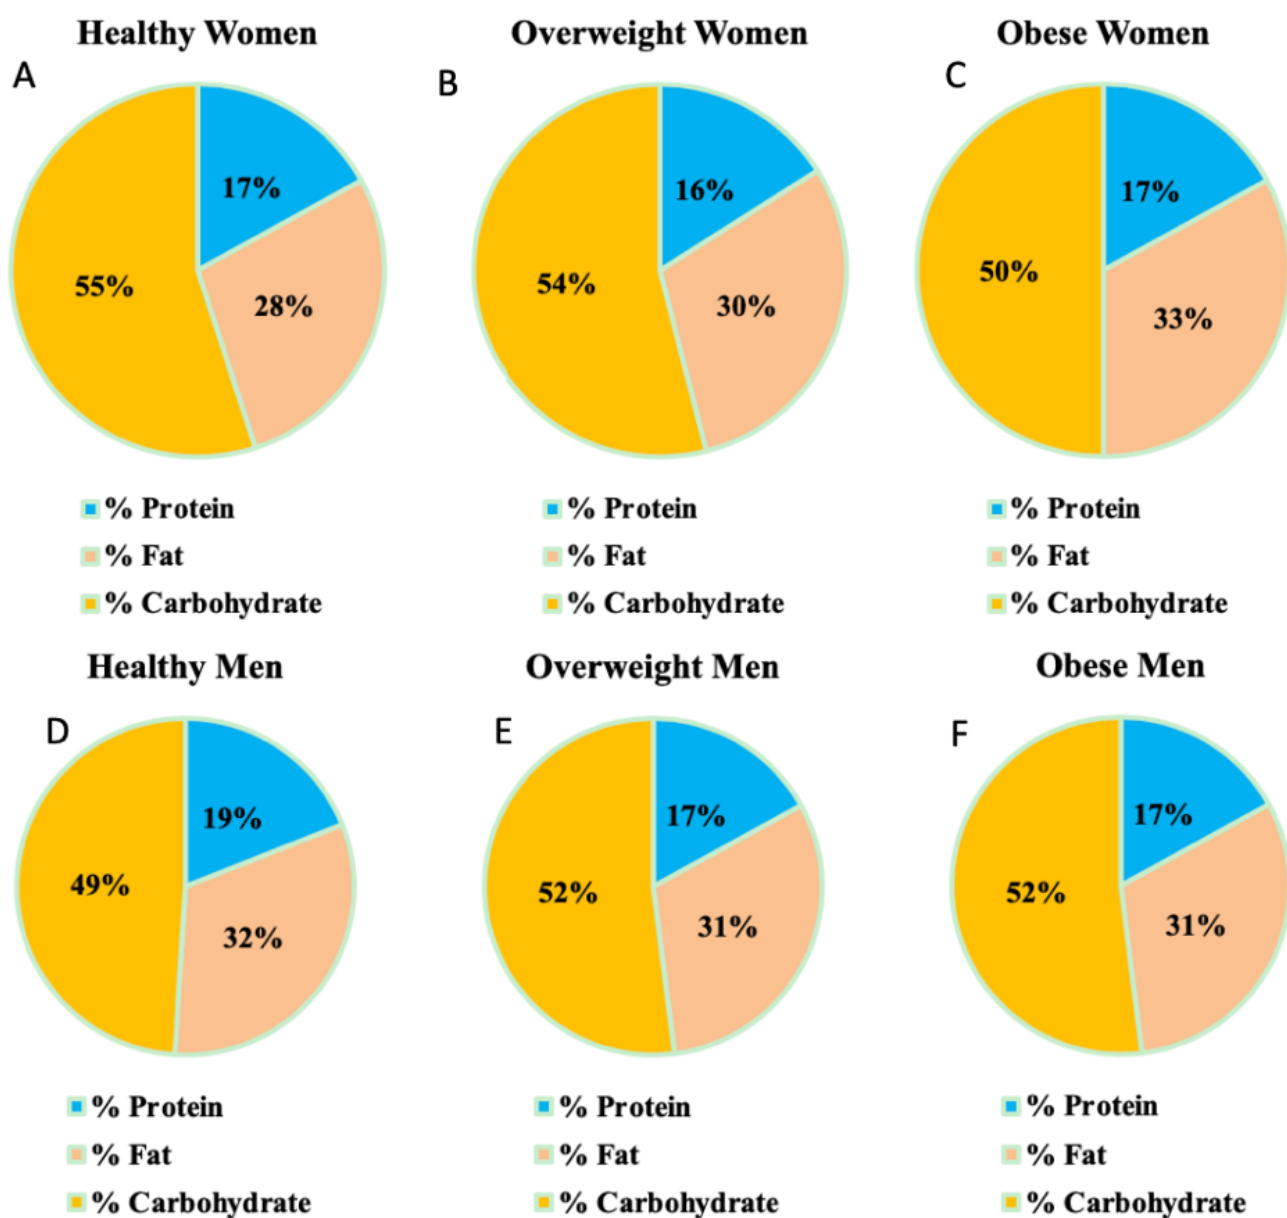

**Figure S1.** Pie charts of macronutrient breakdown between sex and BMI groups: (A) Normal weight women. (B) Overweight women. (C) Obese women. (D) Normal weight men. (E). Overweight men. (F) Obese men.

**Table S5.** Significant metabolites by BMI classification for men and women.

| BMI                  |                        |                  |                      | Sex                                                                                            |         |
|----------------------|------------------------|------------------|----------------------|------------------------------------------------------------------------------------------------|---------|
| Metabolites          |                        | Post Hoc         |                      | Metabolites                                                                                    | P-Value |
|                      | Normal vs. Over-weight | Normal vs. Obese | Overweight vs. Obese |                                                                                                |         |
| Acetohydroxamic acid |                        |                  | 0.025                | Glucose/Galactose                                                                              | 0.005   |
| TMAO                 |                        |                  | 0.038                | Succinate                                                                                      | 0.032   |
| Acetylcarnitine      | 0.017                  |                  |                      | <b>Key</b><br>Downregulated in Lower BMI Group or Men<br>Upregulated in Lower BMI Group or Men |         |
| Asparagine           | 0.042                  |                  |                      |                                                                                                |         |
| Creatinine           | 0.011                  |                  | 0.013                |                                                                                                |         |
| Glutamic acid        | 0.006                  |                  | 0.01                 |                                                                                                |         |
| Pipecolic acid       | 0.009                  |                  |                      |                                                                                                |         |
| Cytidine             | 0.015                  |                  | 0.016                |                                                                                                |         |
| Leucic acid          |                        |                  | 0.015                |                                                                                                |         |
| D-Galacturonic acid  |                        |                  | 0.012                |                                                                                                |         |
| Picolinic acid       | 0.008                  |                  | 0.045                |                                                                                                |         |
| 2-Pyrrolidinone      |                        | 0.002            | 0.016                |                                                                                                |         |
| Kynurenine           | 0.004                  |                  |                      |                                                                                                |         |
| Nonadecanoic acid    |                        |                  | 0.012                |                                                                                                |         |
| Decanoylcarnitine    |                        | 0.026            |                      |                                                                                                |         |
| 2-Aminoadipic acid   | 0.009                  |                  | 0.002                |                                                                                                |         |

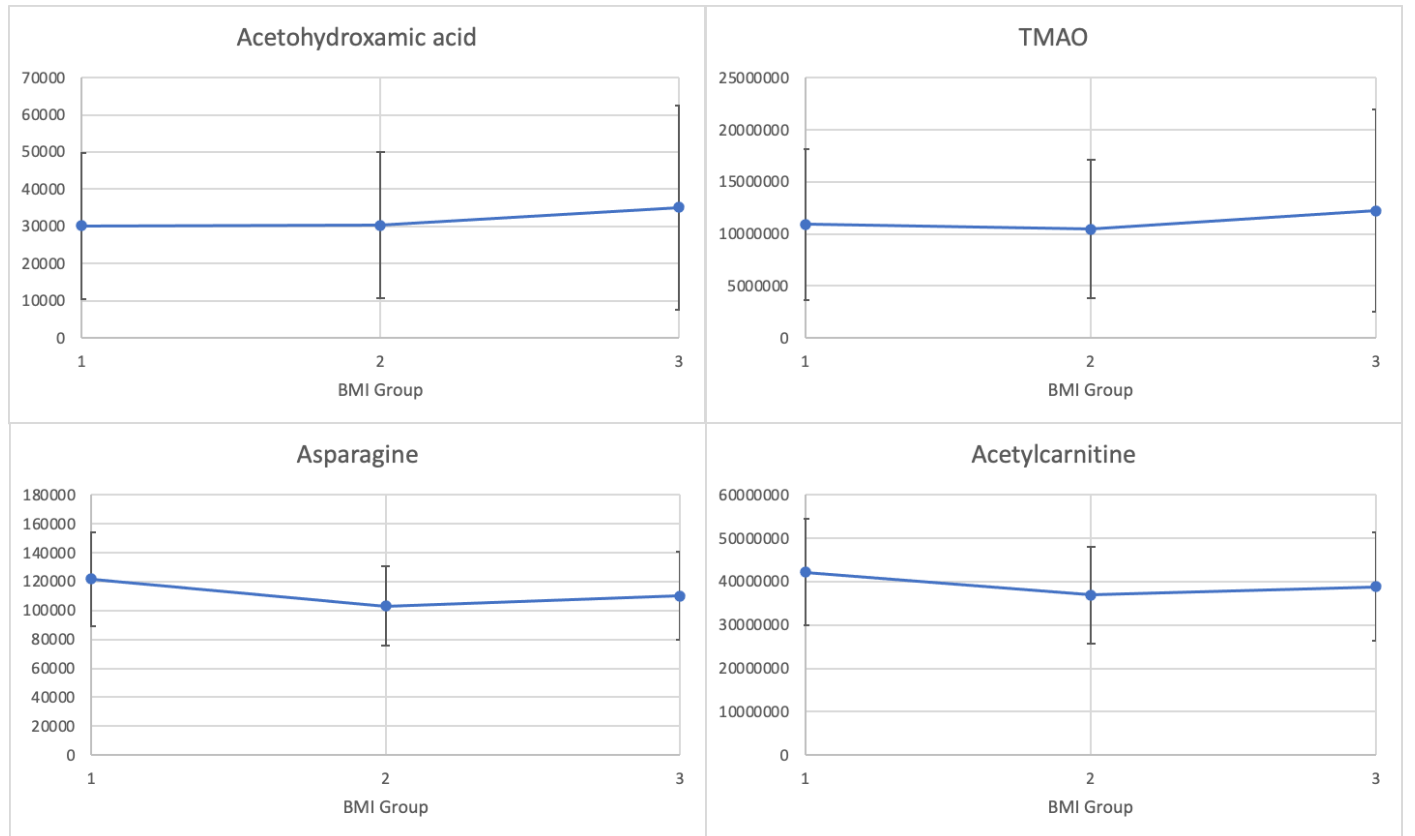

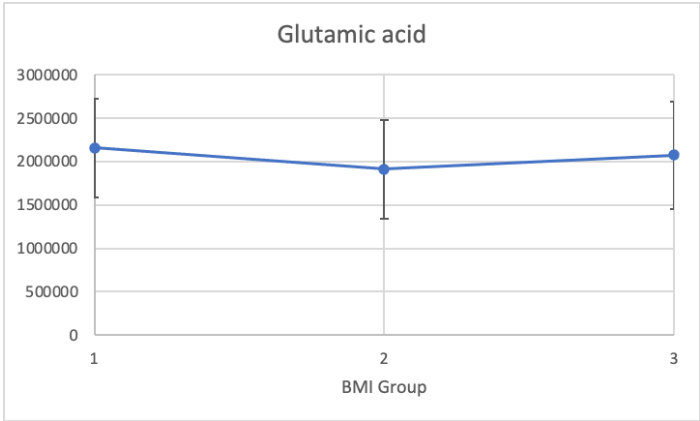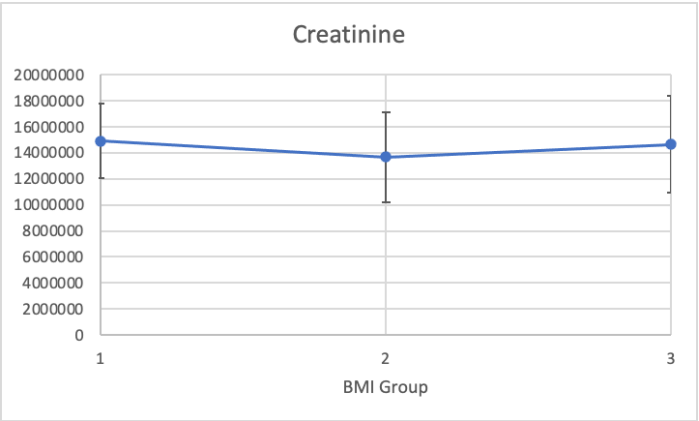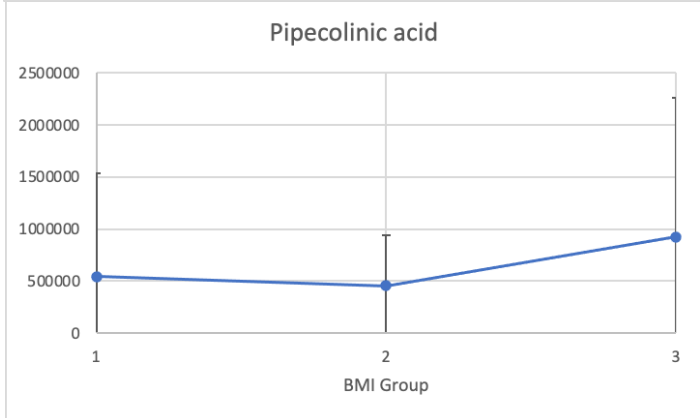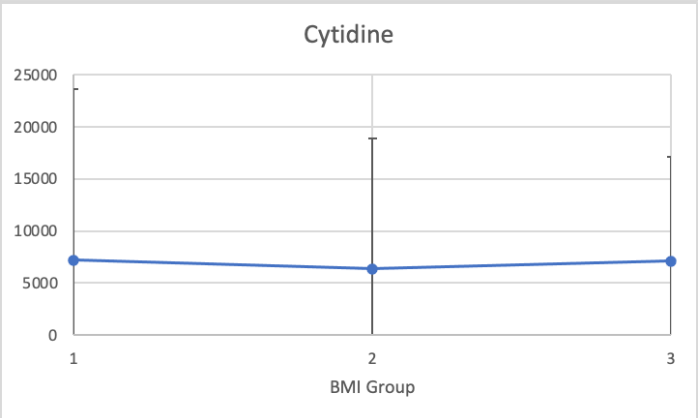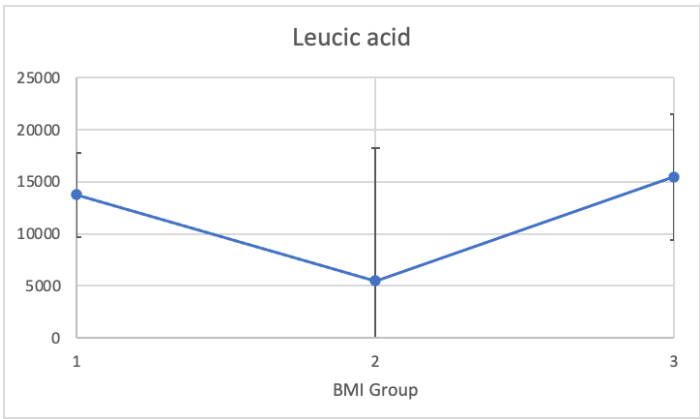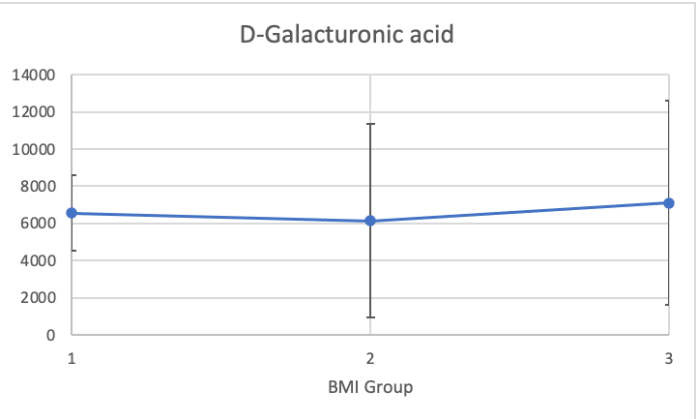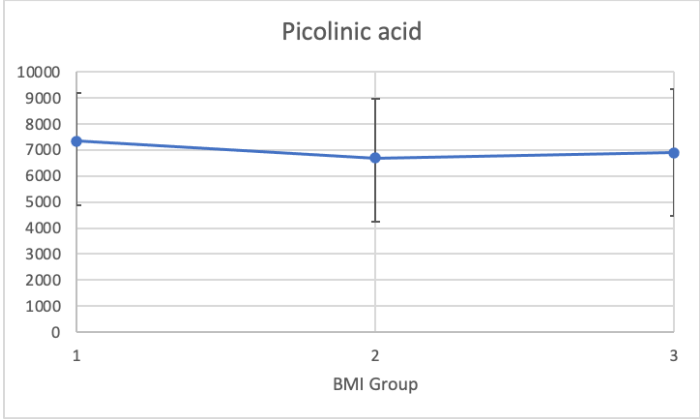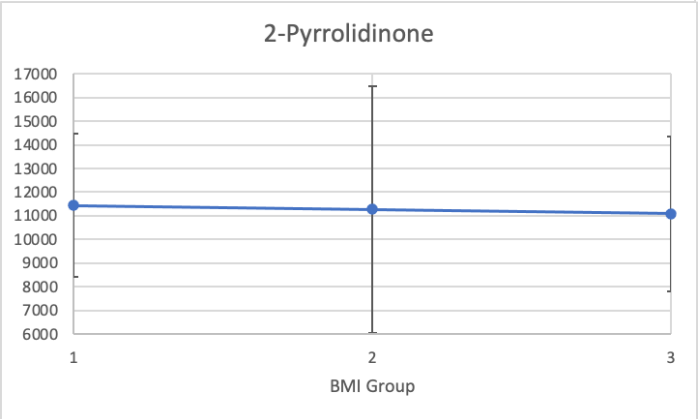



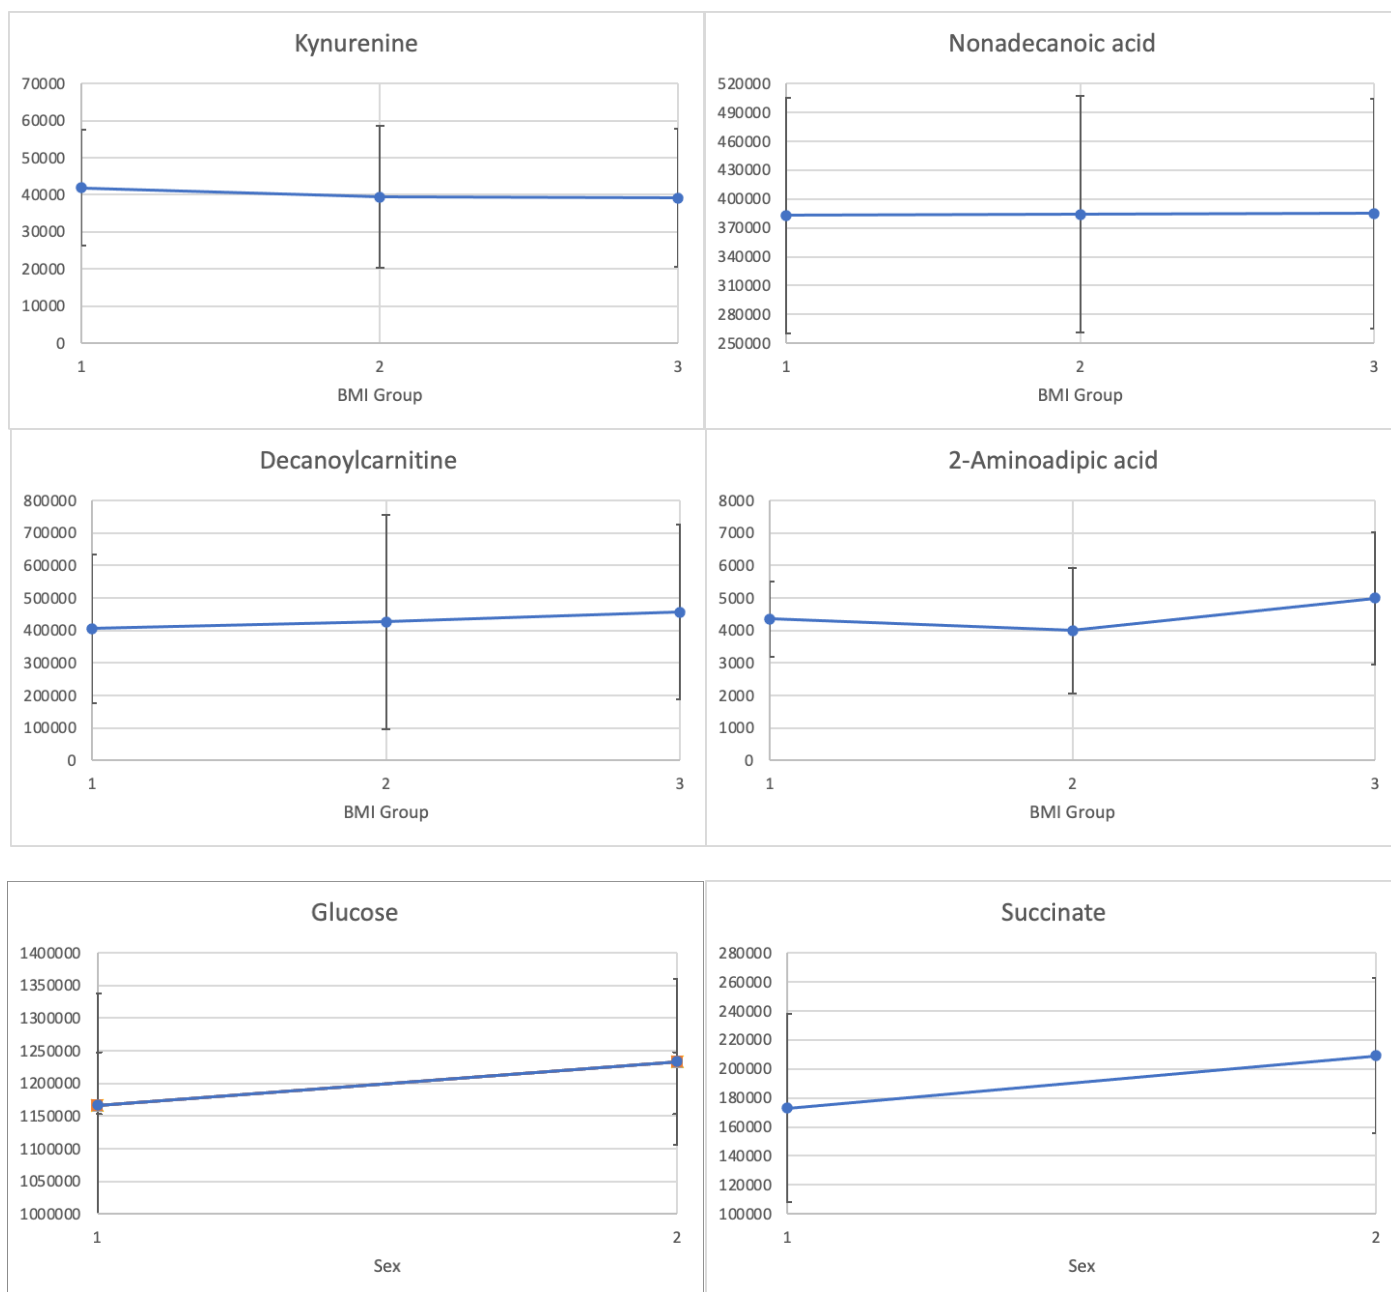

**Figure S2.** Significant metabolites by mean abundances of BMI & sex classification for men and women. BMI groups were stratified into three categories: 1 - normal weight ( $< 25$  BMI), 2 - overweight ( $25 < \text{BMI} < 30$ ), and 3 - obese ( $\text{BMI} > 30$ ). Sex was classified as 1 - men and 2 – women.

**Table S6.** Matrix of correlation analysis between metabolites showing *r* and (*P*-Value).

| Metabolites        | Acetohydroxamic acid | Fructose          | Isoleucine        | Picolinic acid    | 2-Pyrrolidinone   | Asparagine        |
|--------------------|----------------------|-------------------|-------------------|-------------------|-------------------|-------------------|
| TMAO               | 0.995<br>(<0.001)    | 0.116<br>(0.320)  | 0.028<br>(0.813)  | 0.095<br>(0.419)  | 0.277<br>(0.016)  | -0.077<br>(0.509) |
| Glucose            | 0.150<br>(0.198)     | 0.879<br>(<0.001) | 0.117<br>(0.319)  | 0.173<br>(0.137)  | 0.115<br>(0.327)  | -0.024<br>(0.841) |
| Kynurenine         | 0.063<br>(0.593)     | 0.043<br>(0.713)  | 0.826<br>(<0.001) | 0.684<br>(<0.001) | 0.669<br>(<0.001) | 0.606<br>(<0.001) |
| Glutamic acid      | 0.082<br>(0.484)     | 0.107<br>(0.359)  | 0.790<br>(<0.001) | 0.518<br>(<0.001) | 0.601<br>(<0.001) | 0.644<br>(<0.001) |
| Creatinine         | 0.049<br>(0.678)     | 0.228<br>(0.049)  | 0.647<br>(<0.001) | 0.533<br>(<0.001) | 0.584<br>(<0.001) | 0.513<br>(<0.001) |
| 2-Aminoadipic acid | -0.045<br>(0.702)    | 0.097<br>(0.409)  | 0.451<br>(<0.001) | 0.580<br>(<0.001) | 0.313<br>(0.006)  | 0.228<br>(0.049)  |

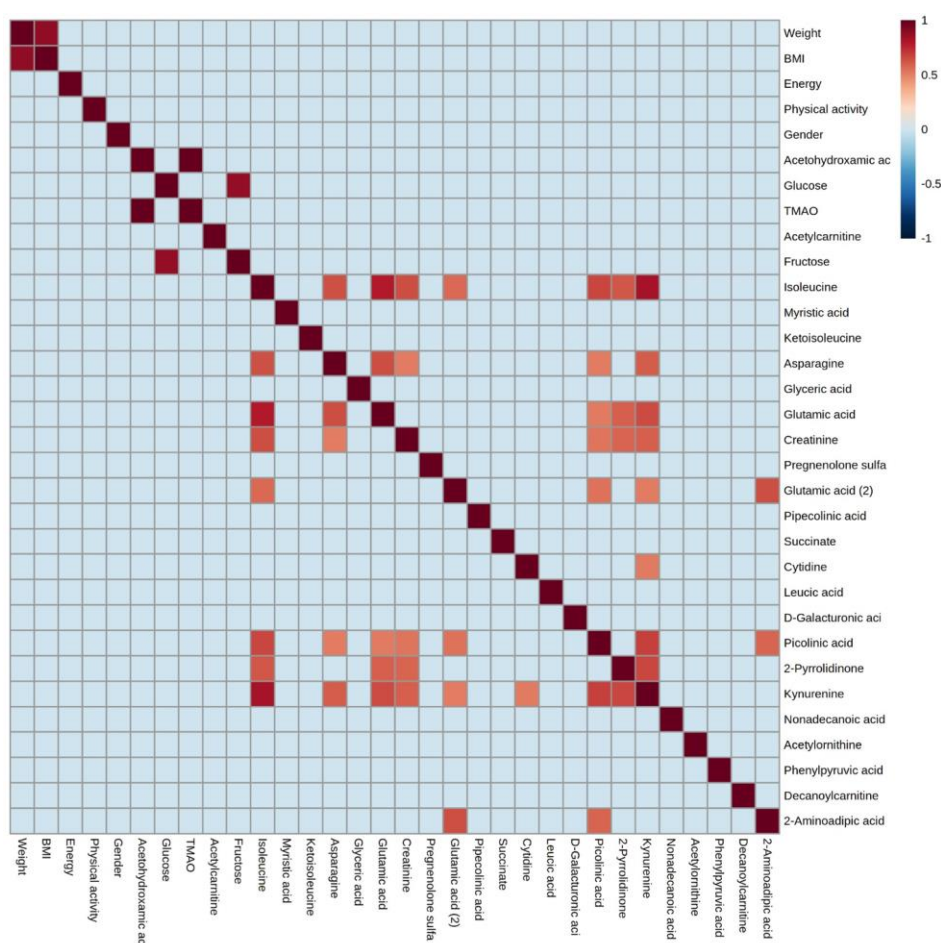

**Figure S3.** Correlation heatmap of significant metabolites and subject demographics performed using Pearson's *r*. All subjects included in the analysis, correlation cutoff = 0.5.

**Table S7.** Pathway Analysis of the impact of sex on the metabolome.

| Pathway                                      | Total Metabolites | <i>P</i> -Value | Impact |
|----------------------------------------------|-------------------|-----------------|--------|
| Lysine degradation                           | 3                 | <0.001          | 0.14   |
| Vitamin B <sub>6</sub> metabolism            | 1                 | 0.012           | 0.0    |
| Pantothenate and CoA biosynthesis            | 4                 | 0.013           | 0.007  |
| Tyrosine metabolism                          | 3                 | 0.018           | 0.14   |
| Valine, leucine, and isoleucine degradation  | 5                 | 0.018           | 0.021  |
| Valine, leucine, and isoleucine biosynthesis | 6                 | 0.029           | 0.0    |
| Pyruvate metabolism                          | 3                 | 0.046           | 0.292  |

**Table S8.** Fold changes and *P*-values of significant metabolites between men and women.

| Metabolites                  | Fold Change (Women/men) | <i>P</i> -value |
|------------------------------|-------------------------|-----------------|
| Proline                      | 0.875                   | 0.015           |
| Betaine                      | 0.88                    | 0.045           |
| L-Alloisoleucine             | 0.771                   | 0.009           |
| Isoleucine                   | 0.747                   | 0.045           |
| Myristic acid                | 1.156                   | 0.024           |
| 2,3-Dihydroxybenzoic acid    | 1.435                   | 0.022           |
| 3-Methyl-2-oxovaleric acid   | 0.836                   | 0.001           |
| Creatinine                   | 0.829                   | 0.001           |
| Protocatechuic acid          | 1.436                   | 0.021           |
| Glutamic acid                | 0.767                   | 0.007           |
| Citraconic acid              | 0.821                   | 0.001           |
| Creatine                     | 1.185                   | 0.034           |
| 9-Octadecynoic acid          | 1.122                   | 0.042           |
| 4-Methyl-2-oxopentanoic acid | 0.777                   | < 0.001         |
| 2/3-Aminoisobutyric acid     | 0.741                   | 0.001           |
| Hypoxanthine                 | 0.763                   | 0.02            |
| 2-Hydroxyphenylacetic acid   | 0.785                   | < 0.001         |
| Leucic acid                  | 0.744                   | 0.002           |
| Picolinic acid               | 0.841                   | 0.032           |
| Lauric acid                  | 1.424                   | < 0.001         |
| Tyrosine                     | 0.828                   | 0.016           |
| 3-Phenyllactic acid          | 0.726                   | 0.001           |
| Phenylpyruvic acid           | 0.841                   | 0.008           |
| 2-Aminoadipic acid           | 0.689                   | < 0.001         |

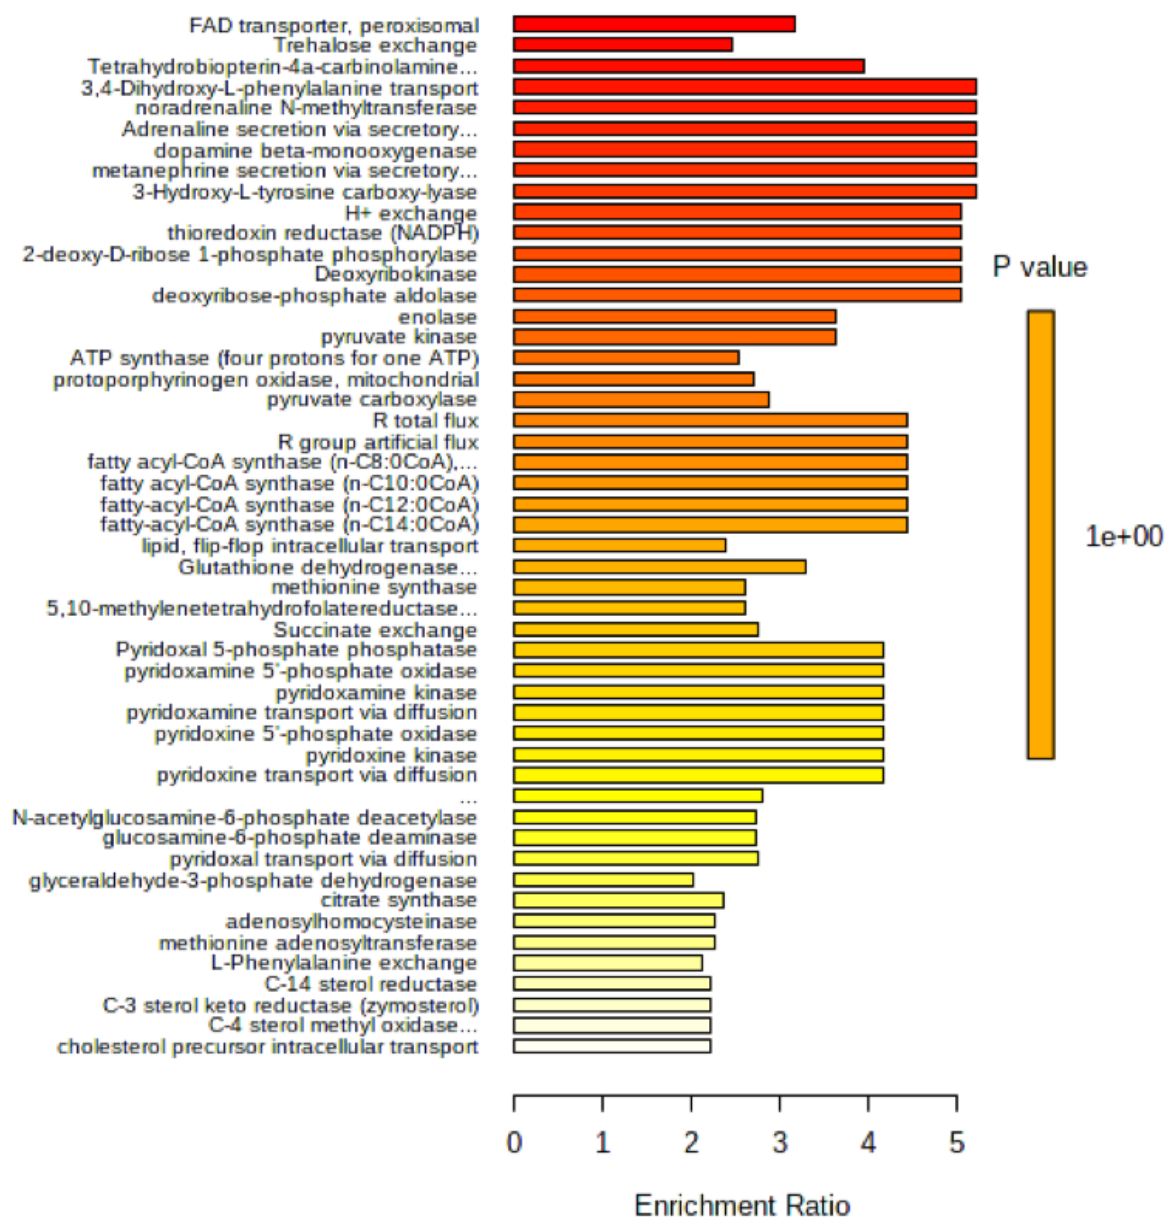

**Figure S4.** Enrichment Analysis assessing the impact of sex on the metabolome.
